# Supplementary material
Source: HighWire-hosted journal article supplement (https://qdcxjkg.com/highwire/filestream/114545/field_highwire_adjunct_files/0/CHEST-2_ERJ_online_suppl_info_clean.pdf)
Supplement: CHEST-2_ERJ_online_suppl_info_clean.pdf [file CHEST-2_ERJ_online_suppl_info_clean.pdf]

## ONLINE SUPPLEMENTARY INFORMATION

TABLE S1 Rates of adverse events per 100 patient-years in CHEST-1 and CHEST-2

| AE, n (rate per 100 patient-years) <sup>#</sup> | CHEST-1             |                     | CHEST-2             |
|-------------------------------------------------|---------------------|---------------------|---------------------|
|                                                 | Riociguat (n=173)   | Placebo (n=88)      | Total (n=237)       |
| <b>Any AE</b>                                   | <b>889 (1732.5)</b> | <b>405 (1525.0)</b> | <b>2081 (550.9)</b> |
| <b>Five most frequent AEs in CHEST-2</b>        |                     |                     |                     |
| Nasopharyngitis                                 | 29 (56.5)           | 10 (37.7)           | 86 (22.8)           |
| Dizziness                                       | 57 (111.1)          | 13 (49.0)           | 61 (16.2)           |
| Peripheral oedema                               | 30 (58.5)           | 20 (75.3)           | 61 (16.2)           |
| Upper respiratory tract infection               | 11 (21.4)           | 4 (15.1)            | 40 (10.6)           |
| Diarrhoea                                       | 27 (52.6)           | 4 (15.1)            | 39 (10.3)           |
| Dyspnoea                                        | 9 (17.5)            | 14 (52.7)           | 39 (10.3)           |
| <b>AEs of special interest</b>                  |                     |                     |                     |
| Syncope                                         | 4 (7.8)             | 4 (15.1)            | 22 (5.8)            |
| Hypotension                                     | 16 (31.2)           | 3 (11.3)            | 17 (4.5)            |
| <b>Other AEs of interest</b>                    |                     |                     |                     |
| Haemoptysis/pulmonary haemorrhage               | 4 (7.8)             | 0                   | 11 (2.9)            |

<sup>#</sup>: total number of events are shown; a patient may have more than one event.  
AE: adverse event.

TABLE S2 Missing data sensitivity analyses for 6MWD and WHO FC at week 12 and 1 year of CHEST-2

|                                           | Change from baseline in 6MWD, mean±SD (m) |                   |                                                      | WHO FC improved/<br>stabilised/worsened (%) <sup>#</sup> |                        |
|-------------------------------------------|-------------------------------------------|-------------------|------------------------------------------------------|----------------------------------------------------------|------------------------|
|                                           | CHEST-2<br>Week 12                        | CHEST-2 1 year    |                                                      | CHEST-2<br>Week 12                                       | CHEST-2<br>1 year      |
|                                           | LOCF <sup>***</sup>                       | LOCF <sup>¶</sup> | Mixed-model<br>for repeated<br>measures <sup>+</sup> | LOCF <sup>***</sup>                                      | LOCF <sup>§</sup>      |
| <b>Former riociguat<br/>group (n=155)</b> | +57±69 m                                  | +51±67 m          | +54±6 m                                              | 41/55/4%                                                 | 45/48/7%               |
| <b>Former placebo group<br/>(n=82)</b>    | +43±72 m                                  | +36±71 m          | +38±8 m                                              | 40/57/4% <sup>f</sup>                                    | 40/57/4% <sup>f</sup>  |
| <b>Overall population (n=237)</b>         | +52±70 m                                  | +46±69 m          | +48±5 m                                              | 40/56/4% <sup>##</sup>                                   | 43/51/6% <sup>##</sup> |

<sup>#</sup>: data do not always add up to 100% due to rounding.

<sup>\*\*\*</sup>: with worst value imputation.

<sup>¶</sup>: without worst value imputation.

<sup>+</sup>: data are LS mean±SEM.

<sup>§</sup>: with worst value plus 1 (V) in cases of death.

<sup>f</sup>: n=81.

<sup>##</sup>: n=236.

6MWD: 6-minute walking distance; FC: functional class; LOCF: last observation carried forward; LS: least-squares; SD: standard deviation; SEM: standard error of the mean.

FIGURE S1 Daily dose of riociguat received during CHEST-2

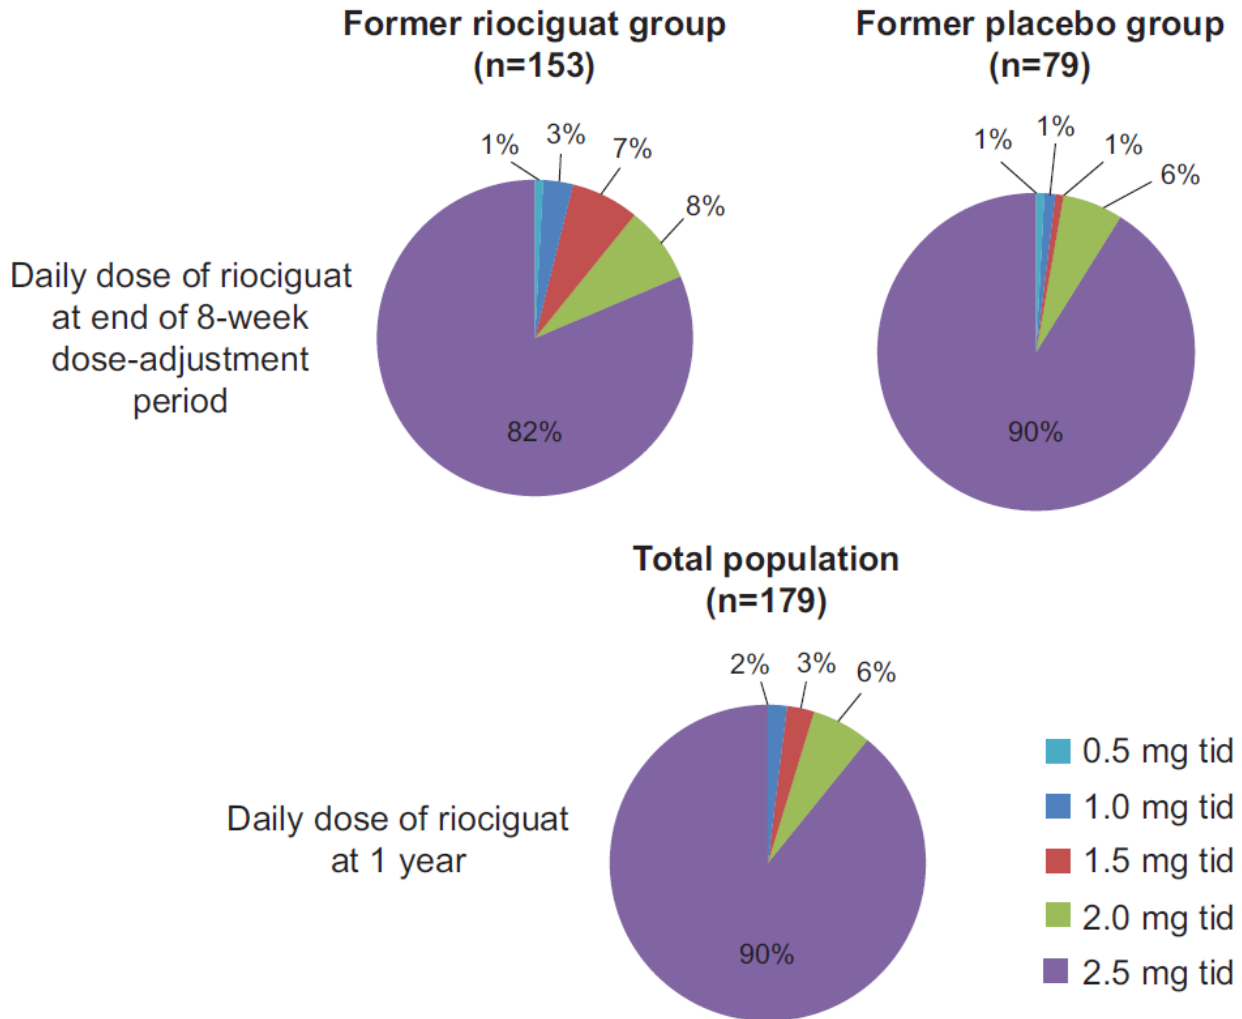

tid: three times daily.

Percentages may not add up to 100% due to rounding.
